# Supplementary material for: A sensitive dual colorimetric and fluorescence system for assaying the activity of alkaline phosphatase that relies on pyrophosphate inhibition of the peroxidase activity of copper ions
Source: Royal Society of Chemistry journal article supplement (doi:10.1039/c4an00778f), 2014-01-01
Supplement: c4an00778f1.pdf [file c4an00778f1.pdf]

## **Supplementary Information**

### **A sensitive dual colorimetric and fluorescence system for assaying the activity of alkaline phosphatase that relies on pyrophosphate inhibition of the peroxidase activity of copper ions**

Ki Soo Park, Chang Yeol Lee, and Hyun Gyu Park\*

Dr. K. S. Park, C. Y. Lee, Prof. H. G. Park

Department of Chemical and Biomolecular Engineering (BK 21+ program)

KAIST, Daejeon, 305-701 (Republic of Korea)

\*Corresponding author. Tel.: +82-42-350-3972; Fax: +82-42-350-3910.

E-mail address: hgpark@kaist.ac.kr

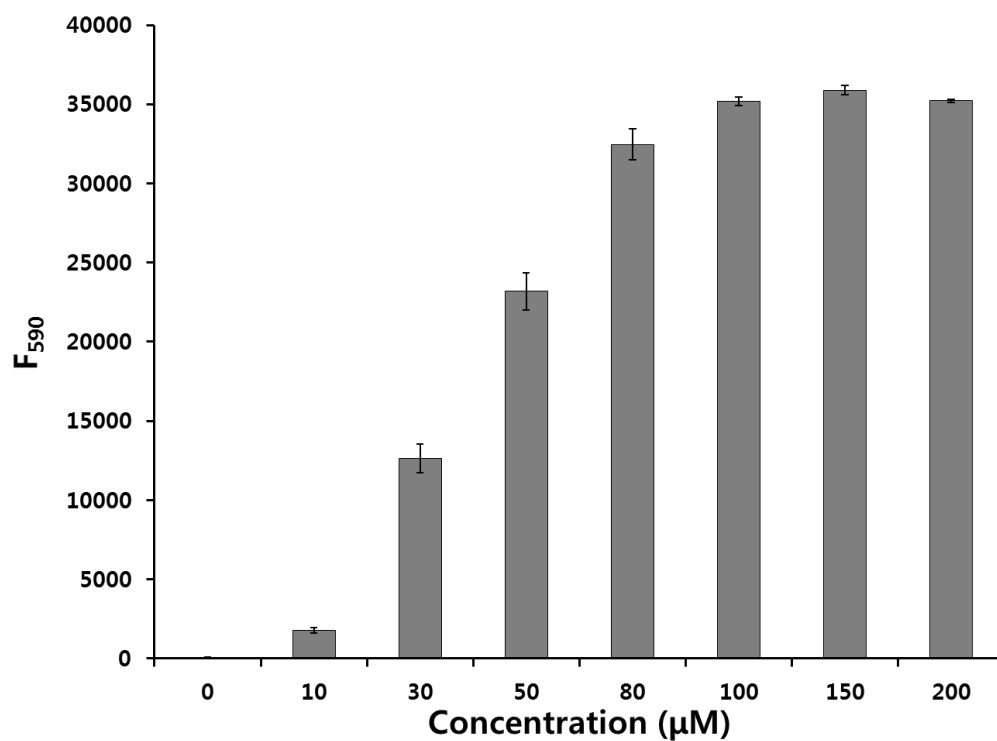

**Figure S1.** Fluorescence intensities ( $\lambda_{\text{max}} = 590 \text{ nm}$ ) of oxidation products formed by reaction of AUR with varying concentrations of  $\text{Cu}^{2+}$ . The final concentrations of AUR substrate and  $\text{H}_2\text{O}_2$  are  $50 \mu\text{M}$  and  $1 \text{ mM}$ , respectively.

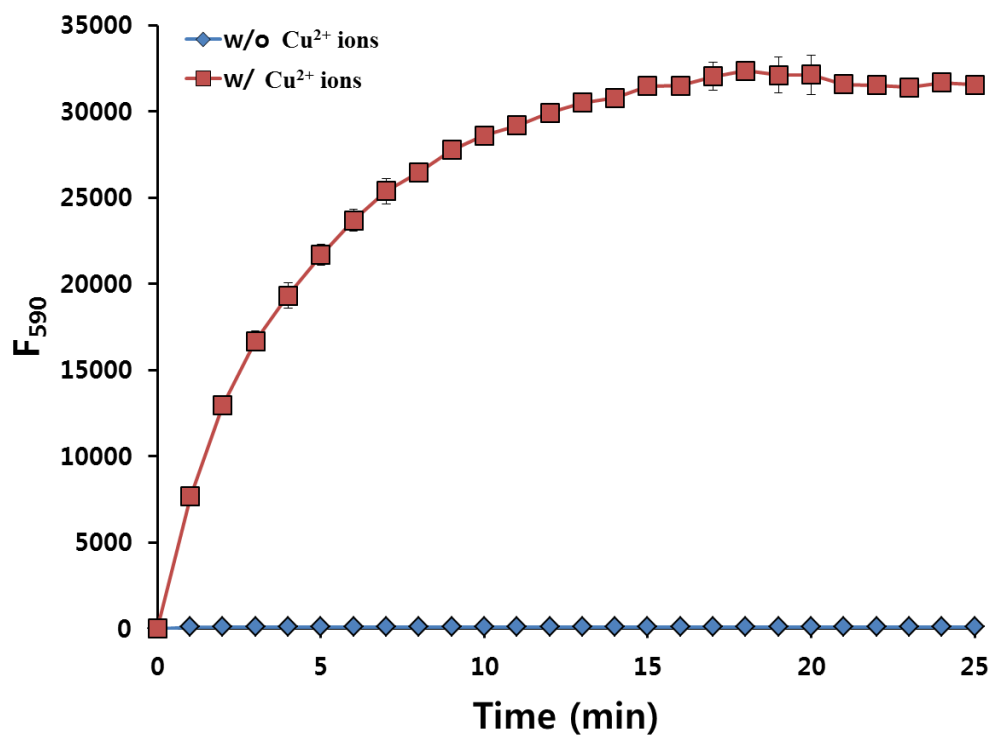

**Figure S2.** Time dependent fluorescence intensities ( $\lambda_{\text{max}} = 590 \text{ nm}$ ) of reaction mixtures containing AUR in the absence (blue) and presence (red) of  $\text{Cu}^{2+}$  ions. The final concentrations of  $\text{Cu}^{2+}$ , AUR substrate and  $\text{H}_2\text{O}_2$  are  $100 \mu\text{M}$ ,  $50 \mu\text{M}$  and  $1 \text{ mM}$ , respectively.

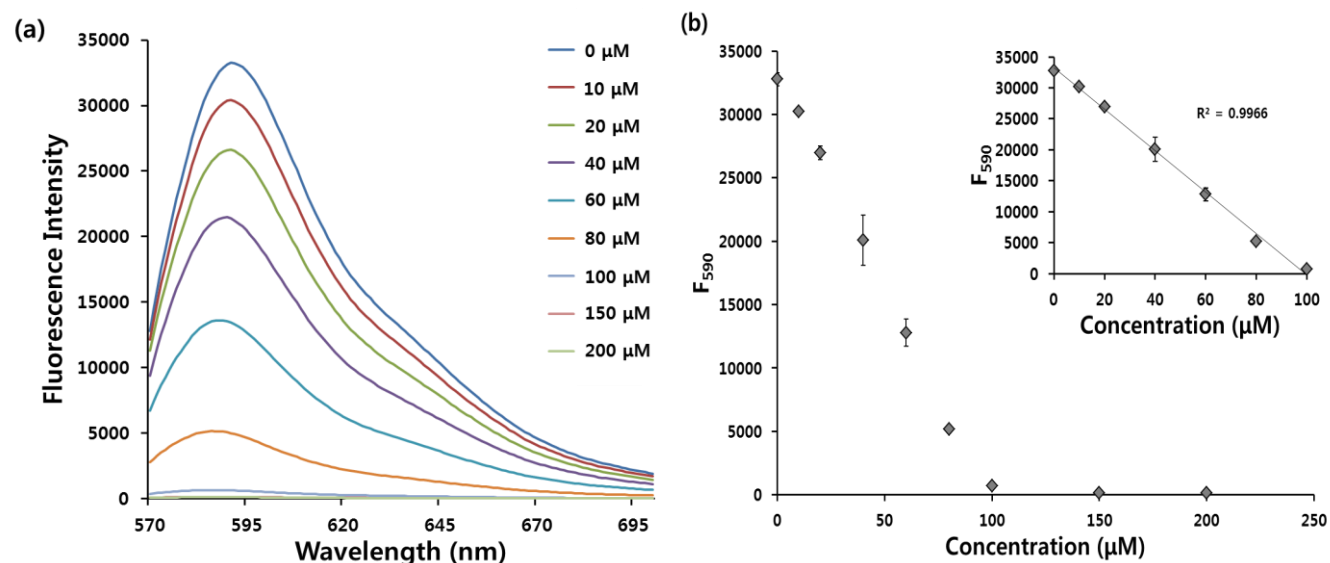

**Figure S3.** The enlarged version of Figure 3.

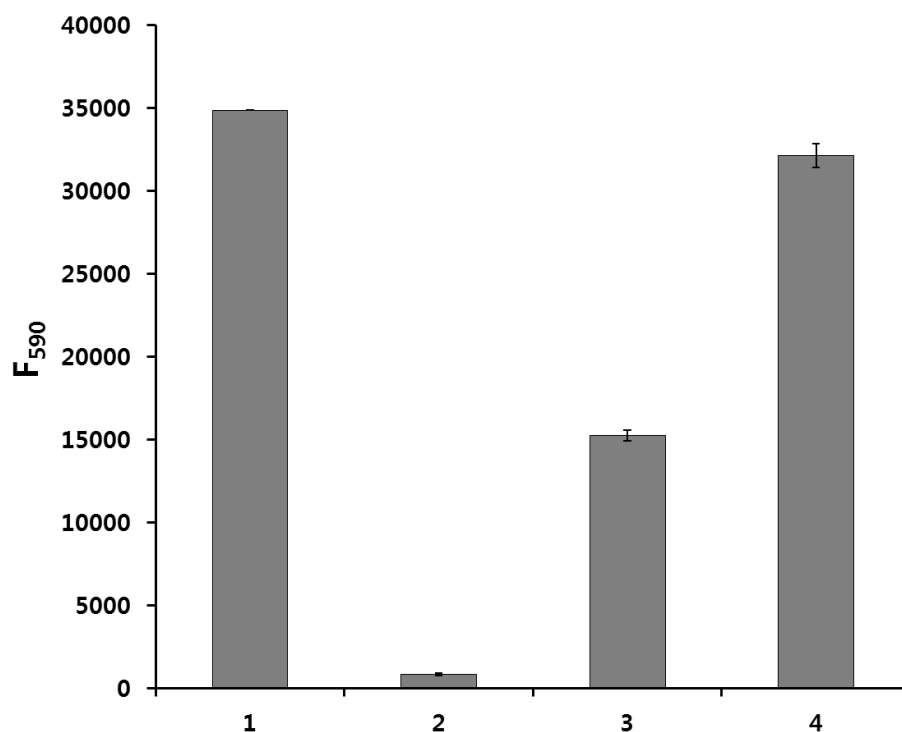

**Figure S4.** Fluorescence intensities from oxidation products formed by reaction between AUR and  $\text{Cu}^{2+}$  after the addition of PPI and ALP. (1) and (2) are fluorescence signals obtained by using free  $\text{Cu}^{2+}$  and  $\text{Cu}^{2+}$  in the presence of PPI, respectively. (3) and (4) are fluorescence signals obtained by using  $\text{Cu}^{2+}$  in the presence of PPI and ALP.  $\text{Cu}^{2+}$  is first added to the PPI solution followed by the addition of ALP (3). Alternatively, ALP is first added to the PPI solution followed by the addition of  $\text{Cu}^{2+}$  (4). The final concentrations of  $\text{Cu}^{2+}$ , PPI, AUR substrate and  $\text{H}_2\text{O}_2$  are 100  $\mu\text{M}$ , 100  $\mu\text{M}$ , 50  $\mu\text{M}$  and 1 mM, respectively.

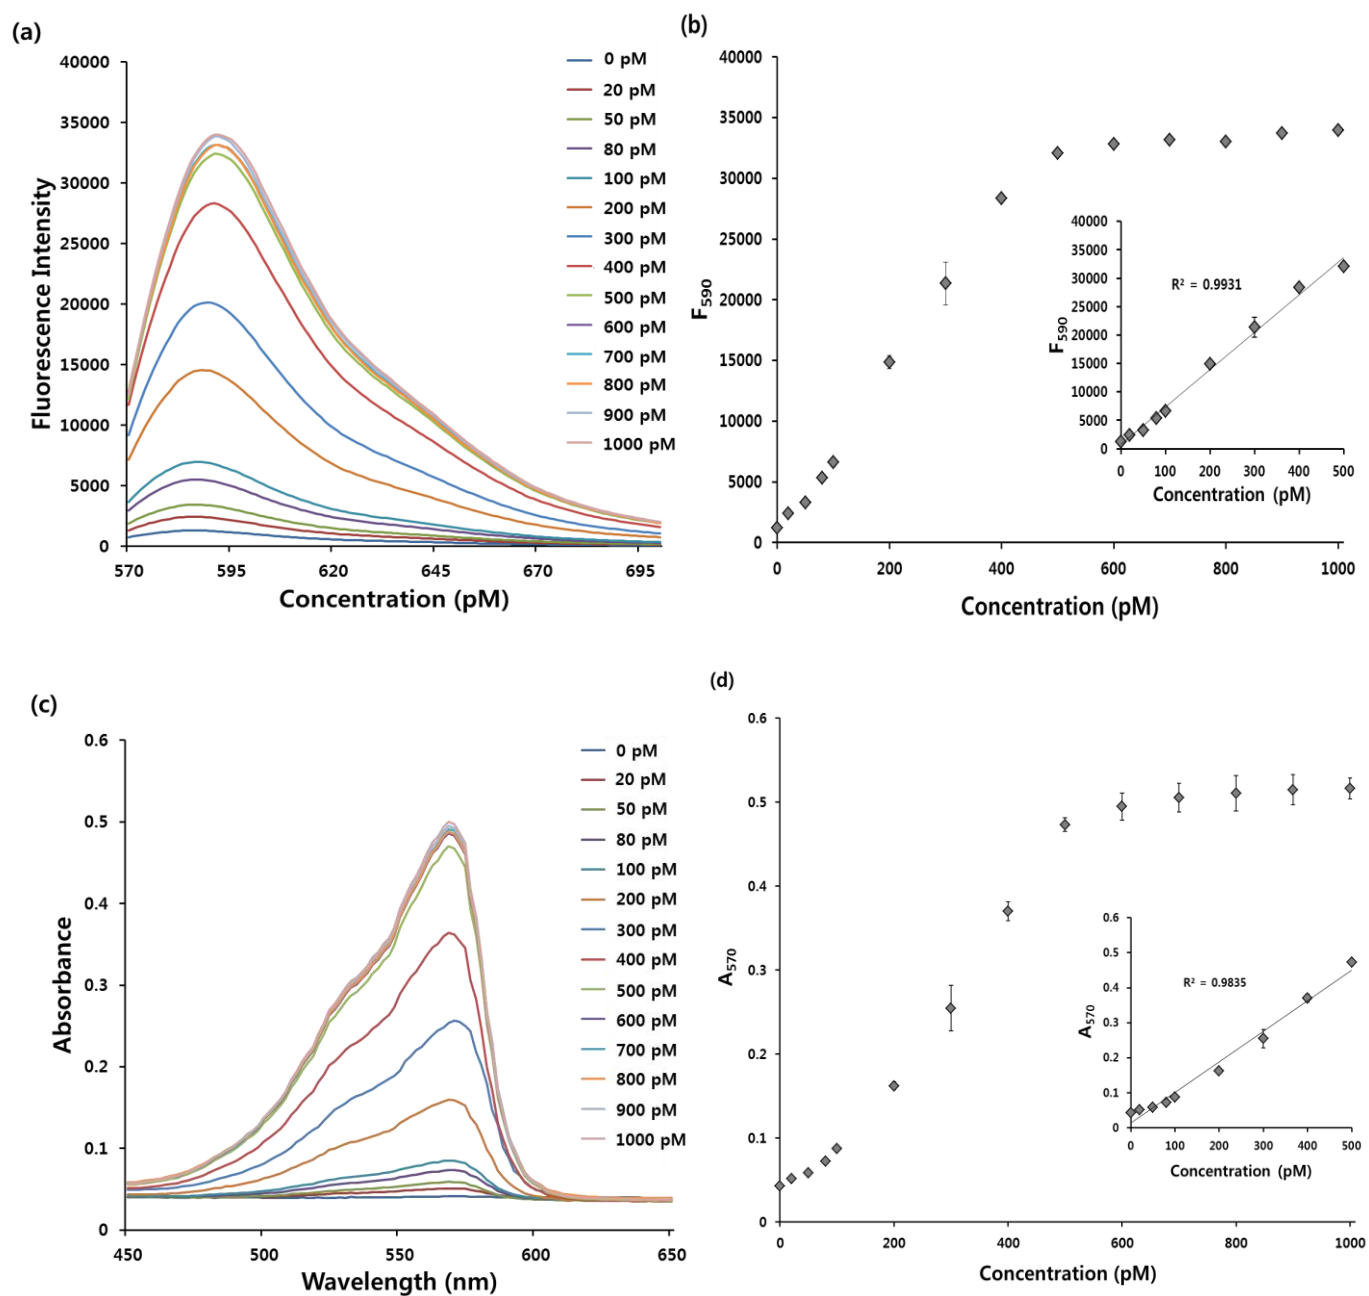

**Figure S5.** The enlarged version of Figure 5.

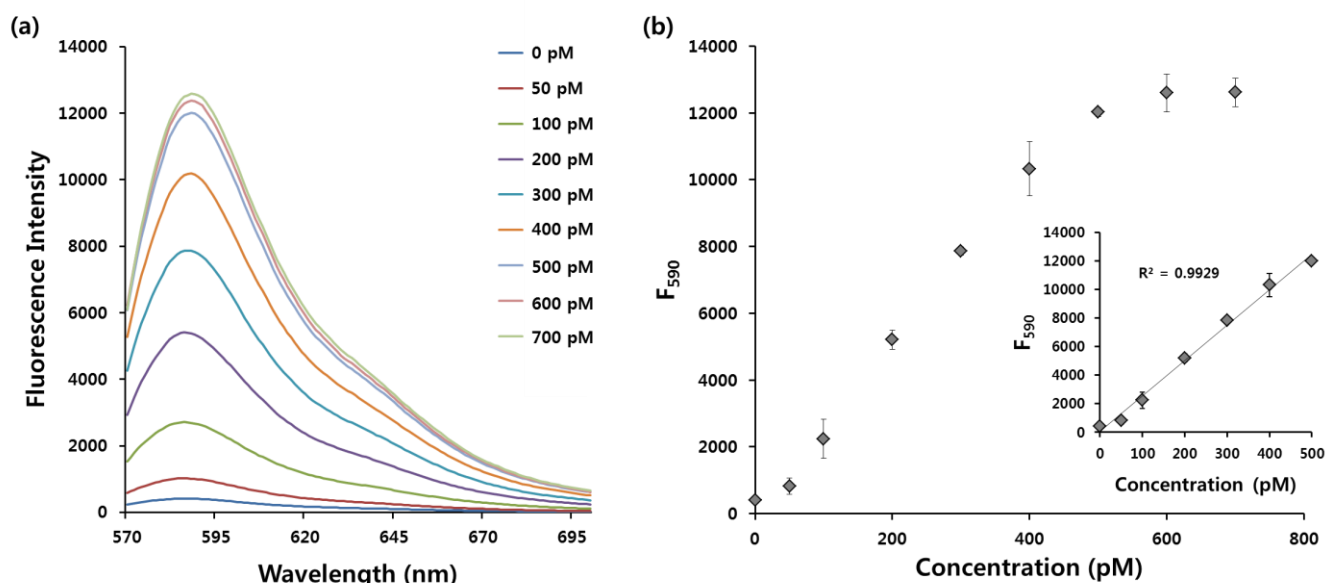

**Figure S6.** (a) Fluorescence emission spectra of the AUR oxidation products formed by reaction with  $\text{Cu}^{2+}$  in the presence of diluted human serum spiked with varying concentrations of ALP. (b) ALP concentration dependent changes of fluorescence intensities at 590 nm. Inset: The linear range of the plot between  $F_{590}$  and ALP concentration (0–500 pM) in diluted human serum. The final concentrations of  $\text{Cu}^{2+}$ , PPi, AUR substrate and  $\text{H}_2\text{O}_2$  are 100  $\mu\text{M}$ , 100  $\mu\text{M}$ , 50  $\mu\text{M}$  and 1 mM, respectively.
